# Supplementary material
Source: publisher site journal article supplement (https://www.spandidos-publications.com/6103/downloadSupplementary)

Figure S1. PD-L1 immunohistochemical expression results in two patients among the present study and matched with PD-L1 mRNA expression status [Magnification for positive quality control results in A and B: x40; magnification for other results in A and B: x200]. (A) Relative mRNA expression of PD-L1 was 2.13 (low mRNA expression). (B) Relatively mRNA expression of PD-L1 was 4.85 (high mRNA expression)]. PD-L1, programmed death ligand-1.

A Results

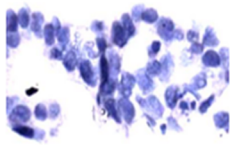

TPS results

Quality control sample results

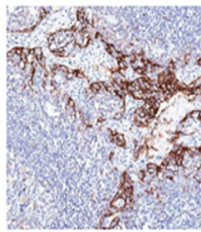

Positive quality control results

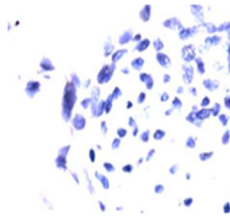

CPS results

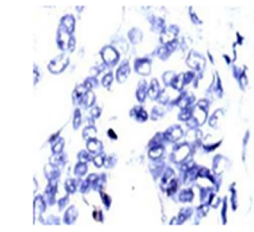

Negative quality control results

B Results

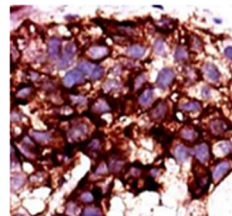

TPS results

Quality control sample results

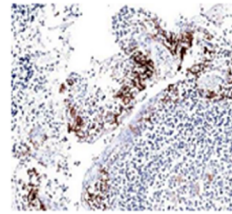

Positive quality control results

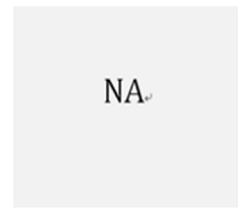

CPS results

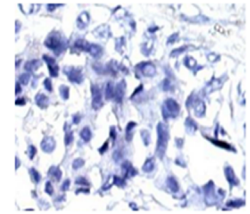

Negative quality control results

Figure S2. Progression-free survival of the 81 patients with advanced non-small cell lung cancer who received PD-1 blockades according to PD-L1 mRNA expression status. PD-L1, programmed death ligand-1.

|                       | Chi-Square | df | Sig.  |
|-----------------------|------------|----|-------|
| Log Rank (Mantel-Cox) | 3.438      | 1  | 0.064 |

Test of equality of survival distributions for the different levels of g.

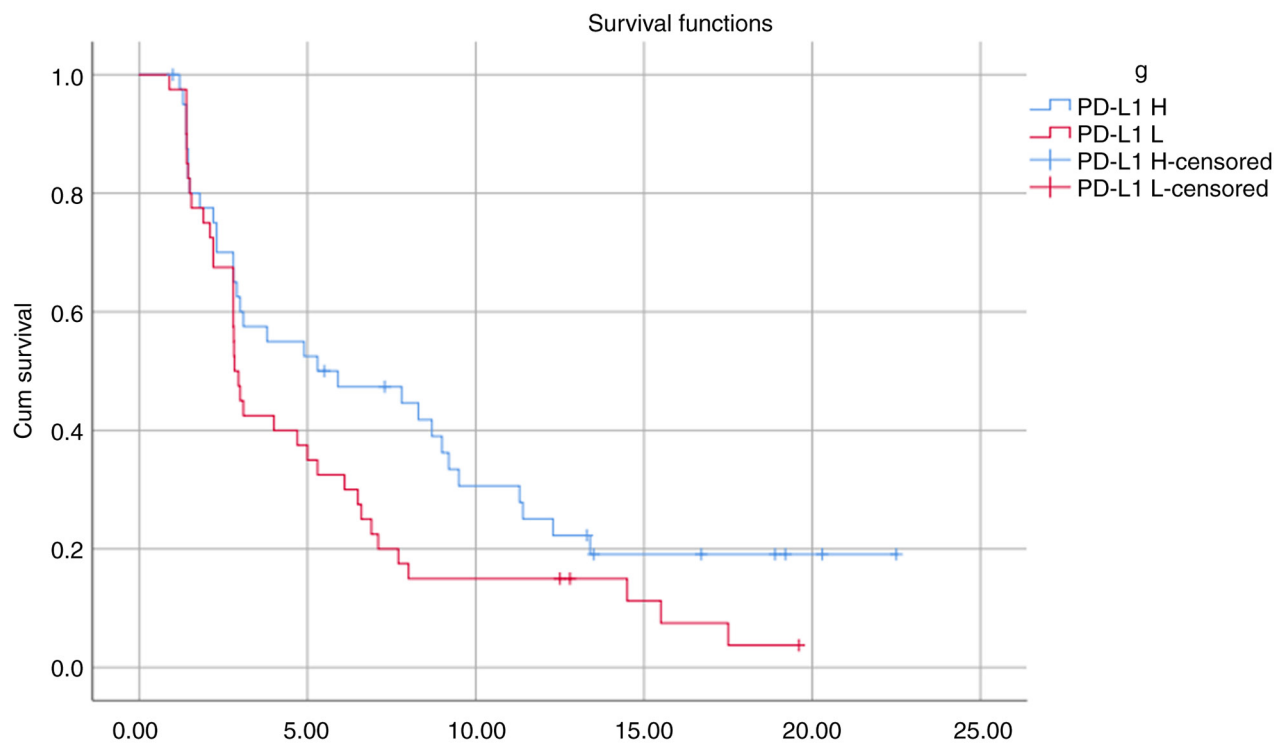

Figure S3. Overall survival of the 81 patients with advanced non-small cell lung cancer who received PD-1 blockades according to PD-L1 mRNA expression status. PD-L1, programmed death ligand-1.

|                       | Chi-Square | df | Sig.  |
|-----------------------|------------|----|-------|
| Log Rank (Mantel-Cox) | 4.559      | 1  | 0.033 |

Test of equality of survival distributions for the different levels of g.

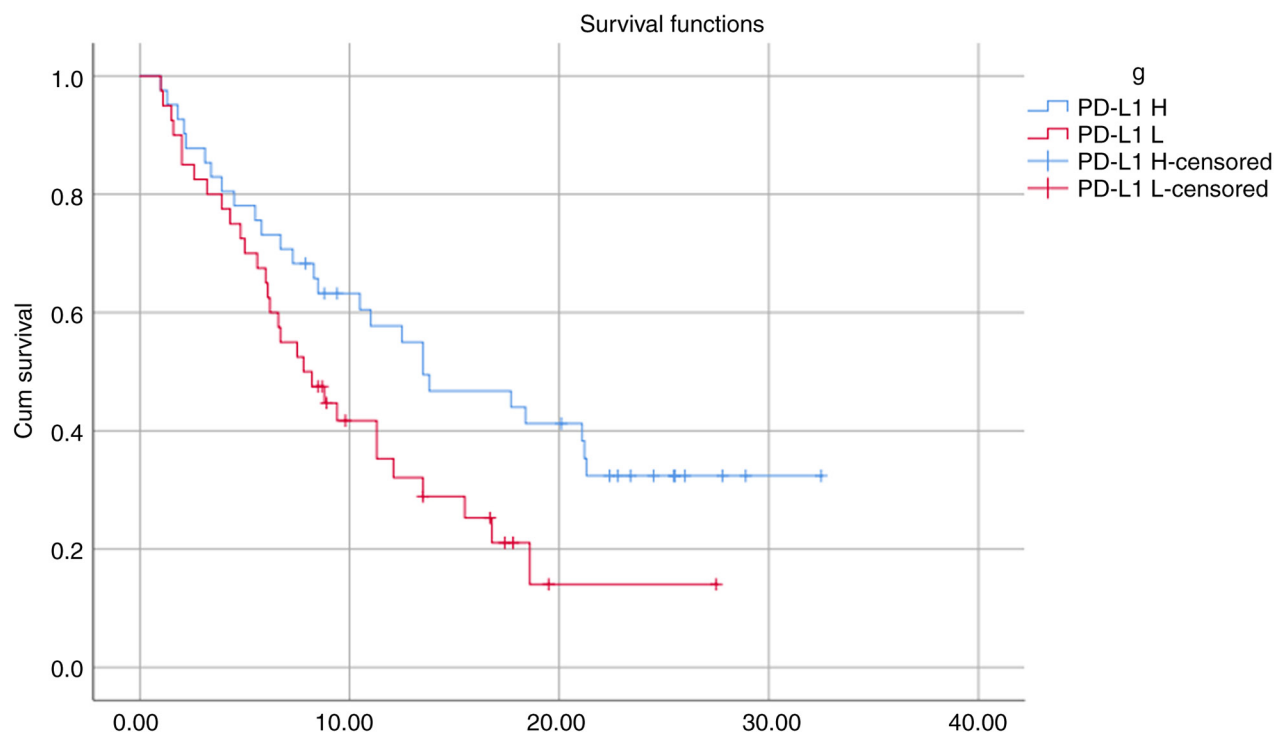

Supplement: Supplementary file 1 [file downloadSupplementary]
